1 Article

# 2 Absence of estrogen leads to defects in spermatogenesis and 3 increased semen abnormalities in male rabbits

4 Aurélie Dewaele<sup>1,2</sup>, Emilie Dujardin<sup>1,2</sup>, Marjolaine André<sup>1,2</sup>, Audrey Albina<sup>1,2</sup>, Hélène Jammes<sup>1,2</sup>, Frank Giton<sup>3,4</sup>,  
5 Eli Sellem<sup>1,2,5</sup>, Geneviève Jolivet<sup>1,2</sup>, Eric Pailhoux<sup>1,2,\*,#</sup> and Maëlle Pannetier<sup>1,2,\*,#</sup>

6 <sup>1</sup> Université Paris-Saclay, UVSQ, INRAE, BREED, 78350, Jouy-en-Josas, France. (A.D.)  
7 [aurelie.dewaele@inrae.fr](mailto:aurelie.dewaele@inrae.fr), (E.D.) [emilie.dujardin@inrae.fr](mailto:emilie.dujardin@inrae.fr), (M.A.) [marjolaine.andre@inrae.fr](mailto:marjolaine.andre@inrae.fr), (A.A.)  
8 [albina.audrey@gmail.com](mailto:albina.audrey@gmail.com), (H.J.) [helene.jammes@inra.fr](mailto:helene.jammes@inra.fr), (G.J.) [genevievejolivet@orange.fr](mailto:genevievejolivet@orange.fr), (E.P.)  
9 [eric.pailhoux@inrae.fr](mailto:eric.pailhoux@inrae.fr), (M.P.) [maelle.pannetier@inrae.fr](mailto:maelle.pannetier@inrae.fr)

10 <sup>2</sup> École Nationale Vétérinaire d'Alfort, BREED, 94700, Maisons-Alfort, France

11 <sup>3</sup> AP-HP, Pôle biologie-Pathologie Henri Mondor, Créteil, France. (F.G.) [frank.giton@u-pec.fr](mailto:frank.giton@u-pec.fr)

12 <sup>4</sup> INSERM IMRB U955, Créteil, France

13 <sup>5</sup> R&D Department, ALLICE, Paris, France. (E.S.) [eliaou.sellem@ynsect.com](mailto:eliaou.sellem@ynsect.com)

14 <sup>#</sup> Both authors contribute equally to this work.

15 <sup>\*</sup> Correspondence: (E.P.) [eric.pailhoux@inrae.fr](mailto:eric.pailhoux@inrae.fr) ; (M.P.) [maelle.pannetier@inrae.fr](mailto:maelle.pannetier@inrae.fr) .

17 **Abstract:** Estrogens are steroid hormones produced by the aromatization of androgens by the  
18 aromatase enzyme, encoded by the *CYP19A1* gene. Although generally referred to as "female sex  
19 hormones", estrogen is also produced in the adult testes of many mammals, including humans. To  
20 better understand the function of estrogens in the male, we used the rabbit model which is an  
21 important biomedical model. First, the expression of *CYP19A1* was localized, demonstrating that  
22 testicular estrogens are produced by meiotic germ cells inside the seminiferous tubules. Next, the  
23 cells expressing ESR1 and ESR2 were identified, showing that estrogens could exert their function  
24 on post-meiotic germ cells in the tubules and play a role during sperm maturation, since ESR1 and  
25 ESR2 were detected in the *cauda* epididymis. Then, CRISPR/Cas9 *CYP19A1*<sup>-/-</sup> genetically modified  
26 rabbits were analyzed. *CYP19A1*<sup>-/-</sup> males showed decreased fertility with lower sperm count  
27 associated with hypo-spermatogenesis and lower spermatid number. Germ/sperm cell DNA  
28 methylation was unchanged, while sperm parameters were affected as *CYP19A1*<sup>-/-</sup> males exhibited  
29 reduced sperm motility associated with increased flagellar defects. In conclusion, testicular  
30 estrogens could be involved in the spermatocyte-spermatid transition in the testis, and in the  
31 acquisition of sperm motility in the epididymis.

32 **Keywords:** *CYP19A1* knock-out; male fertility; testicular estrogens; epididymis; spermatogenesis;  
33 sperm maturation; DNA methylation.

## 35 1. Introduction

36 Sex steroids are key reproductive system hormones in both sexes. Estrogens have  
37 always been considered the female sex steroid hormones and androgens as their male  
38 counterparts. This simplistic assessment remains accurate in different species of  
39 vertebrate and for several developmental pathways such as ovarian development in non-  
40 mammalian species in which estrogen plays a key role [1–5] or in the differentiation of  
41 internal and external male genitalia of mammals for androgens [6]. However, it is clear,  
42 since many decades, that the situation is more complex; on the one hand because the  
43 synthesis of estrogens is made from androgens thus implying the presence, at least  
44 transitory, of androgens in females, and on the other hand because estrogens are also  
45 produced by the testes of mammals where their roles remain to be elucidated (for review  
46 see [7]).

47 Cytochrome P450 aromatase, encoded by the *CYP19A1* gene, is responsible for the  
48 irreversible conversion of androgens to estrogens. This enzyme is expressed in the adult  
49 testes in mammals, but its cellular localization is highly variable depending on the species  
50 and the laboratory of analyses (for review see [8]). Initially, the aromatase expression was  
51 described in Leydig cells in rats [9], pigs [10], stallions [11] or humans [12]. Its expression  
52 in Sertoli cells was also observed in immature rat testes [13] and aromatase was finally  
53 described in meiotic and post-meiotic germ cells of mice [14], rats [9] and humans [15].  
54 Some studies even detected its expression in spermatozoa in pigs [16] and humans [15].

55 To promote their actions, estrogens are known to use two nuclear receptors  
56 ER $\alpha$ /ESR1 and ER $\beta$ /ESR2, resulting in genomic effects; and a G-protein-coupled seven-  
57 transmembrane receptor (GPER, G-Protein Estrogen coupled Receptor) causing rapid  
58 non-genomic effects. On the base of the literature, ERs expression can be detected in all  
59 testicular cell types although the results often differ between species and studies  
60 (reviewed in details by [17]). For example, in the human testis, ESR1 expression has been  
61 described in Leydig cells [18], or in spermatogonia, spermatocytes and round spermatids  
62 [19], or in Leydig, Sertoli and germ cells [20]. This variability of results can be explained  
63 by the existence of ER variants (spliced isoforms [21]), other proteins that share homology  
64 with classical ER, or by the methodologies and antibodies used.

65 The importance of estrogen signaling in the male fertility has been indicated by the  
66 adverse effects of estrogen-like compounds and their interaction with estrogen receptors,  
67 which have been shown to cause pathologies. In rats, nuclear receptor overstimulation  
68 experiments revealed the presumed role of estrogens in spermatogenesis. Treatment with  
69 an ESR1 agonist impaired the formation of elongated spermatids, while administration of  
70 an ESR2 agonist induced spermatocyte apoptosis and spermiation failure both leading to  
71 reduced sperm count [22]. In addition, overexposure to estrogen during spermatogenesis  
72 resulted in epigenetic defects in sperm, such as increased histone retention (ESR1 agonist)  
73 and decreased DNA methylation (ESR2 agonist) [23,24].

74 On the other hand, gene modification experiments carried out in mice tend to show  
75 that estrogens, in the testes and male genital tract, act mainly via the ESR1 receptor.  
76 Indeed, data on ESR2 functions in the male tract are still controversial in mice, since some  
77 showed normal *Esr2*<sup>-/-</sup> male fertility [25], while others described infertility of unknown  
78 origin [26]. In addition, mice deficient for the membrane receptor (*Gper*<sup>-/-</sup>) are fertile and  
79 show no particular phenotype [27]. On the contrary, a complete infertility was described  
80 in male *Esr1*<sup>-/-</sup> [28]. Early in their reproductive life, *Esr1*<sup>-/-</sup> males showed testes with  
81 disorganized seminiferous epithelium and dilated lumen. While sperm counts were  
82 normal in *Esr1*<sup>-/-</sup> males, spermatozoa presented reduced motility (flagellar defects)[28–30]  
83 and were ineffective in *in vitro* fertilization (premature acrosomal reaction in mutants)  
84 [28,30]. The latter phenotypes appeared to be related to epididymal dysfunctions, and  
85 alterations of the epididymal fluid milieu were observed in *Esr1*<sup>-/-</sup> mice [29].

86 Genetic modifications or mutations affecting estrogen production have also been  
87 reported. In mice, in the absence of aromatase in males (*Cyp19a1*<sup>-/-</sup> or ArKO), normal  
88 testicular morphology was observed up to 14 weeks, with no signs of infertility. Then a  
89 progressive alteration of spermiogenesis was reported, leading to an increase in apoptosis  
90 of round spermatids and degeneration of the seminiferous epithelium : the ArKO mice  
91 became infertile with advancing age [31,32]. In humans, aromatase mutations are  
92 extremely rare conditions. In these patients, there are no consistent findings regarding the  
93 testicular phenotype (review in [33]). Nevertheless, when semen collection could be done,  
94 oligo-azoospermia and reduced sperm motility were observed [34,35].

96 The rabbit is an important biomedical model that could help to better understand the  
97 function of this testicular estrogen production for spermatogenesis. Thus, we first  
98 described *CYP19A1*, *ESR1* and *ESR2* expression in the testis and epididymis of adult  
99 rabbits. We showed that estrogens are exclusively produced by germ cells, mainly

100 pachytene spermatocytes. Both *ESR1* and *ESR2* were expressed by round spermatids.  
101 Additionally, these receptors were detected in the epididymis, mainly the *cauda*, where  
102 estrogen could be measured. Then, taking advantage of the *CYP19A1* mutant rabbit model  
103 created by our laboratory [36], we investigated the effects of estrogen deprivation on testes  
104 and sperm production in this species. First, a slight decrease in fertility was observed in  
105 homozygous mutant males. Then, abnormalities of the seminiferous epithelium were  
106 observed, which were related to impaired spermatogenesis and led to a lower sperm  
107 count. Finally, sperm motility was affected and sperm morphological abnormalities were  
108 increased in mutant males suffering from estrogen deprivation.  
109

## 110 2. Materials and Methods

### 111 2.1. Animals

112 New Zealand rabbits (NZ1777, Hypharm, Roussay, France) were bred at the SAAJ  
113 rabbit facility (Jouy-en-Josas, France). All experiments were performed with the approval  
114 of the French Ministry MENESR (accreditation number APAFIS#6775-2016091911407980  
115 vI) following the recommendation given by the local committee for ethic in animal  
116 experimentation (COMETHEA, Jouy-en-Josas). All researchers working directly with the  
117 animals possessed an animal experimentation license delivered by the French veterinary  
118 services. Three independent lines of *CYP19A1* mutant rabbits have been generated [36]  
119 and two of them have been used in this study since no phenotypical differences have been  
120 observed.

121 From sexual maturity (6 months), heterozygous *CYP19A1*<sup>+/-</sup> and homozygous  
122 *CYP19A1*<sup>-/-</sup> males were mated with heterozygous *CYP19A1*<sup>+/-</sup> females, while control males  
123 and females were mated together. The number of mating with or without birth per male,  
124 as well as the number of pups per litter was monitored.  
125

### 126 2.2. Histological and immunohistological analyses

127 Immediately after sampling, pieces of adult testes were immersed in Bouin's fixative  
128 or paraformaldehyde (4% PFA in PBS 1x), fixed for 72 hours then paraffin embedded.  
129 Microtome sections of 5µm thickness were processed. Periodic Acid Schiff (PAS)  
130 colorations were performed by the @Bridge platform (INRAE, Jouy-en-Josas) using an  
131 automatic Varistain Slide Stainer (Thermo Fisher Scientific).

132 *In situ* hybridization (ISH) was performed using the RNAscope ISH methodology  
133 (ACD, Bio-Techne SAS, Rennes, France) as previously described [36]. *CYP19A1*, *ESR1* and  
134 *ESR2* probes that have been used were those published previously [36]. Hybridization  
135 was performed on 5µm sections from PFA fixed tissue using labelling kits (RNAscope  
136 2.5HD assay-brown (conjugated to horse radish peroxidase)) as recommended by the  
137 manufacturer. Hybridization was considered as positive when at least one dot was  
138 observed in one cell. All colored sections (visible) were scanned using a 3DHISTECH  
139 panoramic scanner at the @Bridge platform (INRAE, Jouy-en-Josas).

140 Immunofluorescence was performed on rehydrated sections, where epitope retrieval  
141 was performed with citrate-based unmasking solution in a pressure cooker. DNA was  
142 then denatured 15 min with HCl 2N, and sections were permeabilized by incubation with  
143 0.5% Triton, 1% BSA for 1h30. After an overnight incubation at 4°C with the primary  
144 antibodies (anti-5mC, Eurogentec, ref BI-MECY-0100, 1/500 ; anti-5hmC, Active Motif, ref  
145 39569, 1/500), and a 1-hour incubation at room temperature with secondary antibodies  
146 (Dylight 488 anti-mouse, KPL, ref 072-03-18-06, 1/200 ; anti-rabbit AlexaFluor 488, Life  
147 Technologies, ref A21441, 1/200), slides were mounted in Vectashield mounting medium  
148 (Vector) containing DAPI and images were acquired with a DP50 CCD camera (Olympus).  
149  
150  
151

### 2.3. RNA extraction and RT-qPCR analyses

The testis and epididymis (head and cauda) from adult rabbits were collected and immediately frozen at -80°C. Total RNA from each sample was extracted using the RNeasy® MicroKit (Qiagen, France). Quantitative PCR was performed on reverse transcribed RNAs (High Capacity Reverse cDNA Transcription kit with the included set of random primers, Applied Biosystems, ThermoFisher, France). Based on the output of the GeNorm program, we used *H2AFX*, *YWHAZ* and *SF1* (*Splicing Factor 1*) as the reference genes for this study (Table 1). The results were analyzed with qBase Software [37].

**Table 1.** Primers used by RT-qPCR.

| Gene name      | Forward primer          | Reverse primer             |
|----------------|-------------------------|----------------------------|
| <i>H2AFX</i>   | ACCTGACGGCCGAGATCCT     | CGCCCAGCAGCTTGTGAG         |
| <i>YWHAZ</i>   | GGGTCTGGCCCTTAACCTCTCT  | AGCAATGGCTTCATCAAAAGC      |
| <i>SF1</i>     | GCTCCGACTGCAAATCCA      | TCACCCAGTTCAGCCATGAG       |
| <i>CYP19A1</i> | GGAAGAATGCATCGACTTGAGTT | GGGCCAAAACCAAATGGT         |
| <i>ESR1</i>    | TCCTCATCCTCTCCACATC     | AGCATCTCCAGCAACAGGTC       |
| <i>ESR2</i>    | CTACCAAGCTGGCTGACAA     | AGAGGCGCACTTGGTCCAA        |
| <i>SYCP3</i>   | AAAAGAAATGGCCATGTTGCA   | GAGTCATCAAAGTAACACGGATTGAA |
| <i>PRM1</i>    | CCAGAGGCGAAGAGTCAGGAA   | TCTGGTGGGTCTGCTGTTCTGT     |

### 2.4. Measurement of estradiol, testosterone and DHEA hormone levels in testis and epididymis of adult rabbits

Estradiol, testosterone and DHEA were assayed by GC/MS according to the protocol described by [38] with modifications [39]. Sample extraction and purification, derivatization and determination of steroid levels in testes and epididymides from adult rabbits are described in [36] or can be provided upon request.

### 2.5. Semen collection and sperm parameter analyses (CASA)

Semen of rabbits from the different genotypes were collected using a specially designed artificial vagina. Two successive sampling have been made when possible for each animal. The ejaculate volume was estimated by pipetting and sperm was then immediately diluted in GALAP media (IMV Technologies) which was specifically designed for the conservation of rabbit semen. Each diluted samples was incubated 10 min at 37°C before analyzing sperm parameters using a CASA Hamilton Thorne IVOS II device with the x10 objective.

### 2.6. Luminometric Methylation Assay (LUMA)

DNA extraction from sperm samples was performed as described in [40]. Global DNA methylation levels were quantified using LUMA [41]. Briefly, 1 µg of genomic DNA was cleaved using the isoschizomers HpaII (methylation sensitive) and MspI (non-methylation-sensitive) in two separate reactions and in the presence of EcoRI to standardize for DNA amounts (New England Biolabs). The protruding ends were then used as templates for pyrosequencing with the Pyromark Q24 device and Pyromark Gold Q96 reagents (Qiagen). The luminometric signals produced by either the sequential incorporation of C and G nucleotides (reflecting the number of CCGG sites digested by HpaII or MspI) or the sequential incorporation of A and T nucleotides (reflecting the number of AATT sites digested by EcoRI), were then quantified using Pyromark Q24 software. Each sample was assayed in duplicate.

The global methylation percentage per sample was then calculated as follows:  
Methylation% = [100-(Average signal obtained with HpaII after EcoRI normalization/Average signal obtained with MspI after EcoRI normalization)] \* 100

195  
196  
197  
198  
199  
200  
  
201  
202  
203  
204  
205  
206  
207  
208  
209  
210  
211  
212  
213  
214  
215  
216  
217  
218  
219  
220  
221  
222  
223

## 2.7 Statistics

The statistical analyses were performed using the GraphPad Prism 7 Software (GraphPad Software Inc., La Jolla, CA, USA). Because of the small number of samples in groups, comparisons between values were made by the Mann-Whitney test for non-parametric values. A probability lower than 0.05 was required for significance.

## 3. Results

### 3.1. Localization of CYP19A1/aromatase and ESRs expression in the rabbit testis and epididymis

To decipher which testicular cell type expressed the *CYP19A1* gene and thus, were able to produce estrogens, we carried on *in situ* hybridization by using the RNAscope technology, giving clear and reproducible results on rabbit gonads [36] (Figure 1). Aromatase expression was detected in germ cells exclusively. These cells which were closed to the basal lamina, presented a large nucleus and seemed to correspond to pachytene spermatocytes (Figure 1A). A few labelling was also detected in the round spermatids lying in close proximity of the pachytene cells, suggesting the persistence of some aromatase transcripts in post-meiotic germ cells. In addition, to determine which cell types could respond to estrogens in the seminiferous compartment, probes corresponding to estrogen receptors *ESR1* and *ESR2* were used. The expression of both estrogen receptors was attested into the seminiferous tubules and was restricted to the round spermatids, with a stronger labelling for *ESR1* (Figure 1C).

The expression level of both aromatase and estrogen receptors transcripts was studied and compared within testes and epididymides (*caput* and *cauda*) by RT-qPCR (Figure 1B). Although *CYP19A1* expression was restricted to the testis, *ESR1* expression was strongly detected in the testis and in the tail of the epididymis (*cauda*). *ESR2* expression was also observed in testes, and was faintly detected in both the head and the tail of the epididymis. However, *in situ* hybridization failed to detect *ESR2* (or *ESR1*) expression in the *caput* epididymis (Figure 1C). On the contrary, strong staining was obtained in the mesenchyma with *ESR1* probe and a faint staining for *ESR2* in the epithelial cells of the *cauda* epididymis.



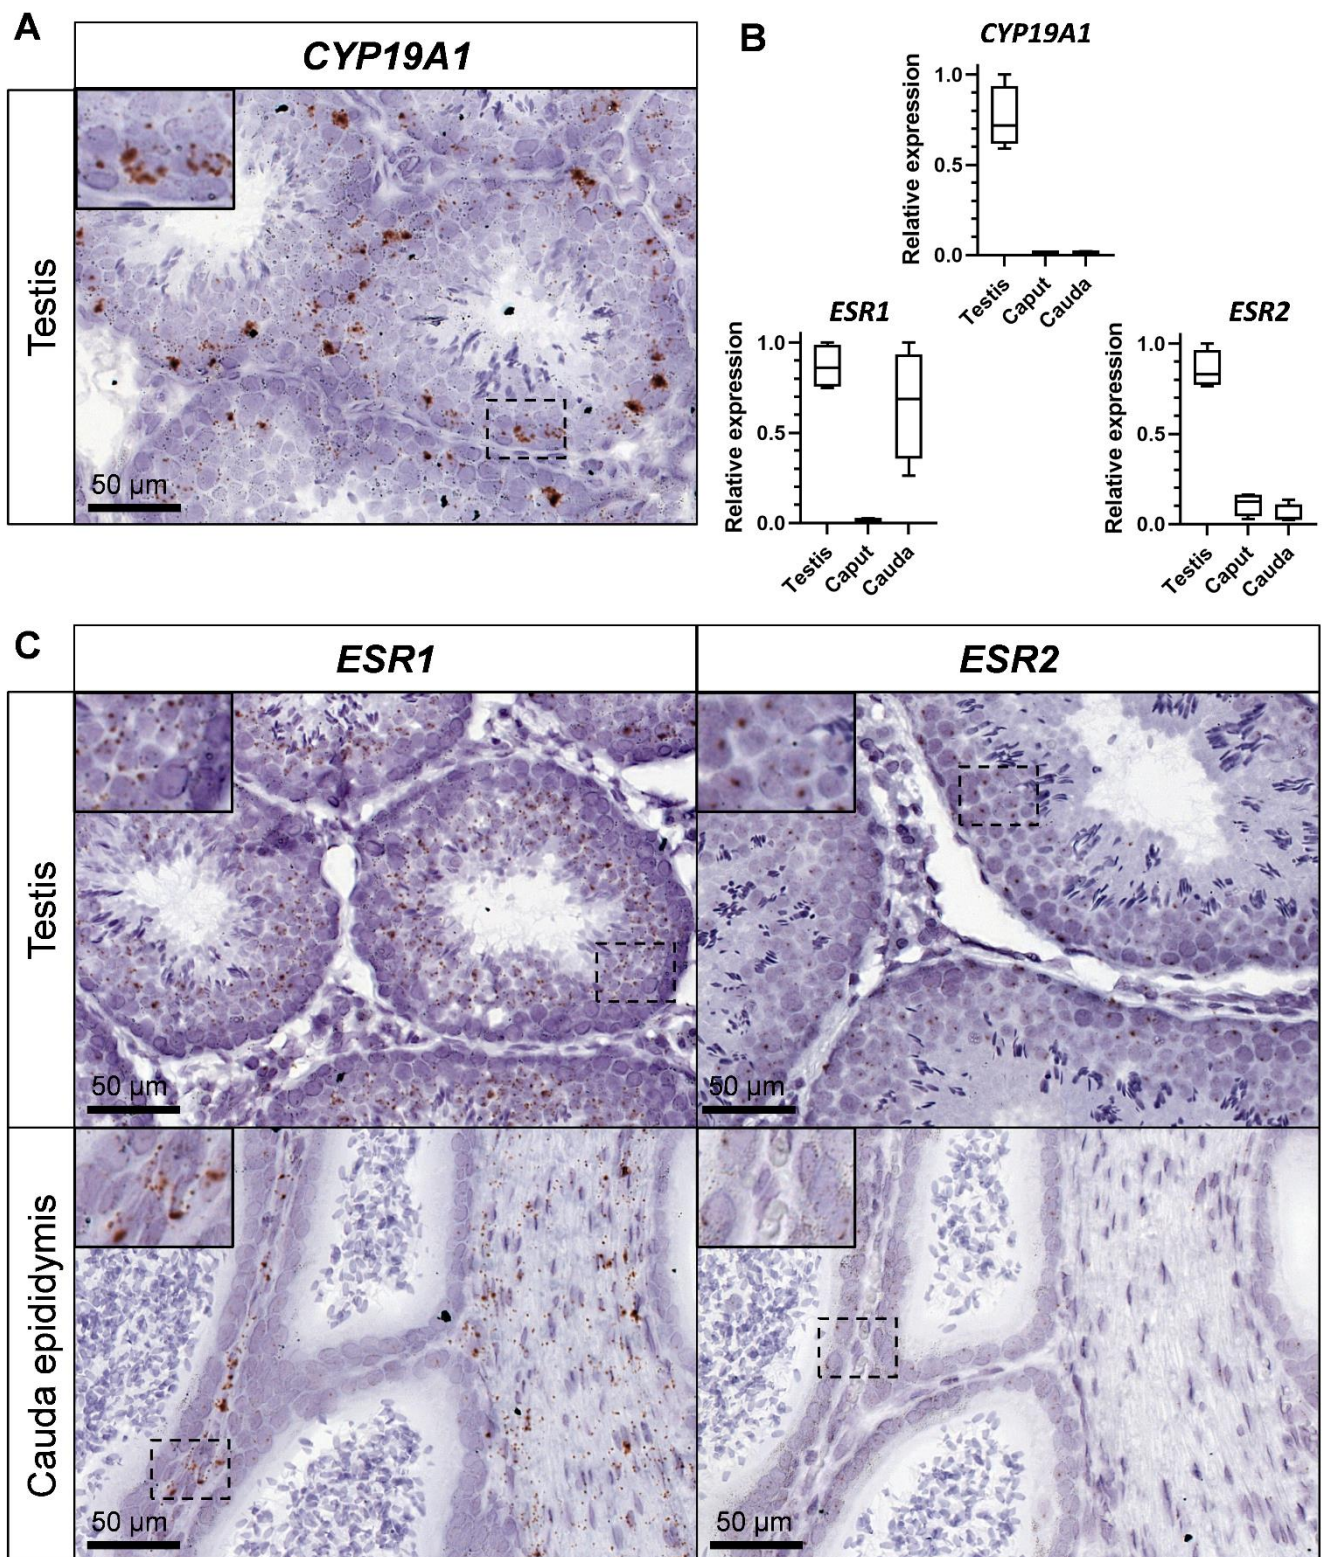

**Figure 1.** *CYP19A1* and estrogen receptors expression in the testis and epididymis of adult rabbits. (A) Location of *CYP19A1* expression by *in situ* hybridization (RNAscope technology) in the adult testis. (B) Relative expression levels of *CYP19A1*, *ESR1* and *ESR2* analyzed by RT-qPCR in the adult testis and epididymis (caput and cauda). Testis n=4; Epididymis n=4. (C) Location of *ESR1* and *ESR2* expression by *in situ* hybridization (RNAscope technology) in the testis and the cauda epididymis.

### 3.2. *CYP19A1* gene-targeting in rabbits efficiently suppresses testicular estrogen secretion

We have previously established three strains of genetically modified rabbits carrying deletions of exon 2 (including the initiator ATG codon) of the *CYP19A1* gene. These rabbit strains were initially created to evaluate the role of fetal estrogens produced by early developing ovaries (i.e.: before meiosis initiation in the germinal lineage) in a non-rodent mammalian species [36]. To confirm that knocking out *CYP19A1* in male really led to testicular estrogen deprivation, we measured estrogen concentrations in *CYP19A1*<sup>-/-</sup> testes in comparison with wild type ones (Figure 2A). As expected, consistent with estrogen assays performed for their female counterparts [36], no testicular estrogen remained detectable in mutant gonads compared to wild type ones where the median 17 $\beta$ -Estradiol value was about 55 pg/g of tissue. Even if testicular estrogen production was abolished, testosterone and dehydroepiandrosterone (DHEA) concentrations remained similar between mutant and wild type testes with respectively, around 9 ng/g and 40 ng/g (median values) in each condition (Figure 2A). These results confirm that the deletions engineered on *CYP19A1* exon 2 in the three rabbit lines efficiently suppressed aromatase activity and estrogen secretion as previously demonstrated in females [36].

We have previously shown that estrogens are produced in the seminiferous tubules. Due to the presence of the blood-testis barrier, estrogens were expected to circulate through the efferent ducts and epididymides. 17 $\beta$ -Estradiol levels were thus measured in the epididymides, showing 25 pg/g and 20 pg/g as median values in the head and the tail of the epididymis respectively (Figure 2B). No estrogen could be detected in *CYP19A1* homozygous mutant epididymides.

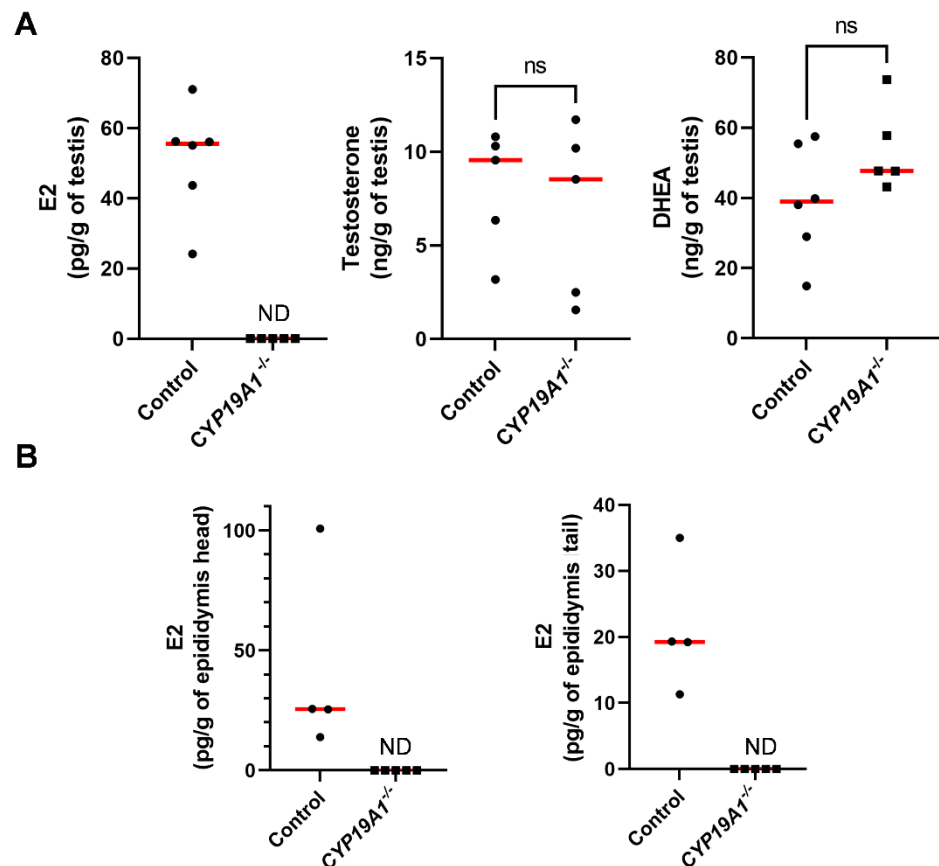

**Figure 2.** Steroid levels in the testis and epididymis in adults. (A) Dosage of 17 $\beta$ -estradiol (E2), testosterone and DHEA concentrations in control and *CYP19A1*<sup>-/-</sup> adult testes by GC/MS. (B) Dosage of 17 $\beta$ -estradiol (E2) in the head and the tail of epididymis. Control n = 4 to 6; *CYP19A1*<sup>-/-</sup> n = 5. The median is shown in red. ND: Non Detected. Mann-Whitney test: \* pValue<0.05. ns: non significant.

257  
258  
259  
260  
261  
262  
263  
264  
265  
266  
267  
268

### 3.3. *CYP19A1* knockout male rabbits show subfertility parameters

During our previous study on *CYP19A1*<sup>-/-</sup> fetal ovary [36], spanning on 8 years, *CYP19A1* genetically modified male rabbits from three different strains have been mated with heterozygous females (*CYP19A1*<sup>+/-</sup>) to expand the lines and produce biological materials. Either heterozygous carrier males (*XY CYP19A1*<sup>+/-</sup>) or homozygous mutant males (*XY CYP19A1*<sup>-/-</sup>) were used. Interestingly, a slight subfertility of homozygous mutant males compared to heterozygous carrier ones was observed on two recorded parameters. First, the percentage of mating without birth was increased when using homozygous mutant males (58.9%) compared to heterozygous carrier males (32.3%) or control rabbits (35.5%) (Figure 3A). Secondly, when mating was successful, the recorded litter size was statistically reduced, as the number of pups per litter dropped from 7.9 (± 3.3) to 6 (± 2.8) by using heterozygous or homozygous mutant males respectively (Figure 3B and 3C).

**A**

|                         | Control males x<br>Control females | <i>CYP19A1</i> <sup>+/-</sup> males x<br><i>CYP19A1</i> <sup>+/-</sup> females | <i>CYP19A1</i> <sup>-/-</sup> males x<br><i>CYP19A1</i> <sup>+/-</sup> females |
|-------------------------|------------------------------------|--------------------------------------------------------------------------------|--------------------------------------------------------------------------------|
| Matings with birth      | 20 (64.5%)                         | 44 (67.7%)                                                                     | 58 (41.1%)                                                                     |
| Matings without birth   | 11 (35.5%)                         | 21 (32.3%)                                                                     | 83 (58.9%)                                                                     |
| Total number of matings | 31                                 | 65                                                                             | 141                                                                            |

**B**

|                                   | Control males x<br>Control females | <i>CYP19A1</i> <sup>+/-</sup> males x<br><i>CYP19A1</i> <sup>+/-</sup> females | <i>CYP19A1</i> <sup>-/-</sup> males x<br><i>CYP19A1</i> <sup>+/-</sup> females |
|-----------------------------------|------------------------------------|--------------------------------------------------------------------------------|--------------------------------------------------------------------------------|
| Number of different males         | 10                                 | 13                                                                             | 18                                                                             |
| Number of different females       | 13                                 | 25                                                                             | 38                                                                             |
| Total number of litters           | 20                                 | 44                                                                             | 58                                                                             |
| Total number of pups              | 156                                | 349                                                                            | 349                                                                            |
| Average number of pups per litter | 7.8 ± 2.5                          | 7.9 ± 3.3                                                                      | 6 ± 2.8                                                                        |

**C**

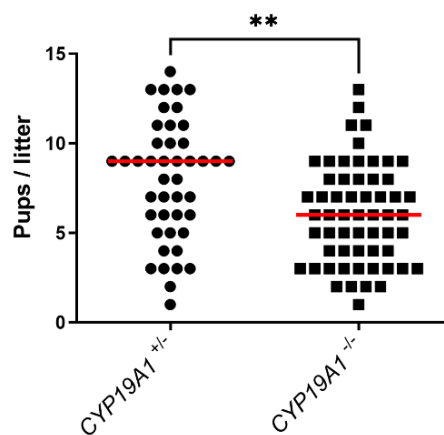

269  
270  
271  
272  
273  
274

**Figure 3.** Effect of the *CYP19A1* gene knock-out on the male fertility. (A) Number of successful and unsuccessful mating, depending on the genotype of the parents. (B) Number of different males and females used and pups per litter depending on the genotype. (C) Number of pups per litter obtained by crossing heterozygous females with heterozygous (*CYP19A1*<sup>+/-</sup>) or homozygous (*CYP19A1*<sup>-/-</sup>) males. The median is shown in red. Mann-Whitney test: \*\* p<0.01



### 3.4. Absence of testicular estrogens leads to spermatogenesis defects

The effects of estrogen deficiency on testicular morphogenesis and function were evaluated in 2- to 3-year-old rabbits. Histological analyses of the testes showed some abnormal seminiferous tubules in the homozygous mutants (Figure 4A-F). These have been found clustered in a few testicular lobules or scattered through the testis (Figure 4C and D and Figure 4E and F respectively). In these abnormal tubules, the thickness of the seminiferous epithelium was reduced and the lumen appeared larger: a drastic decrease of the spermatid layer was observed.

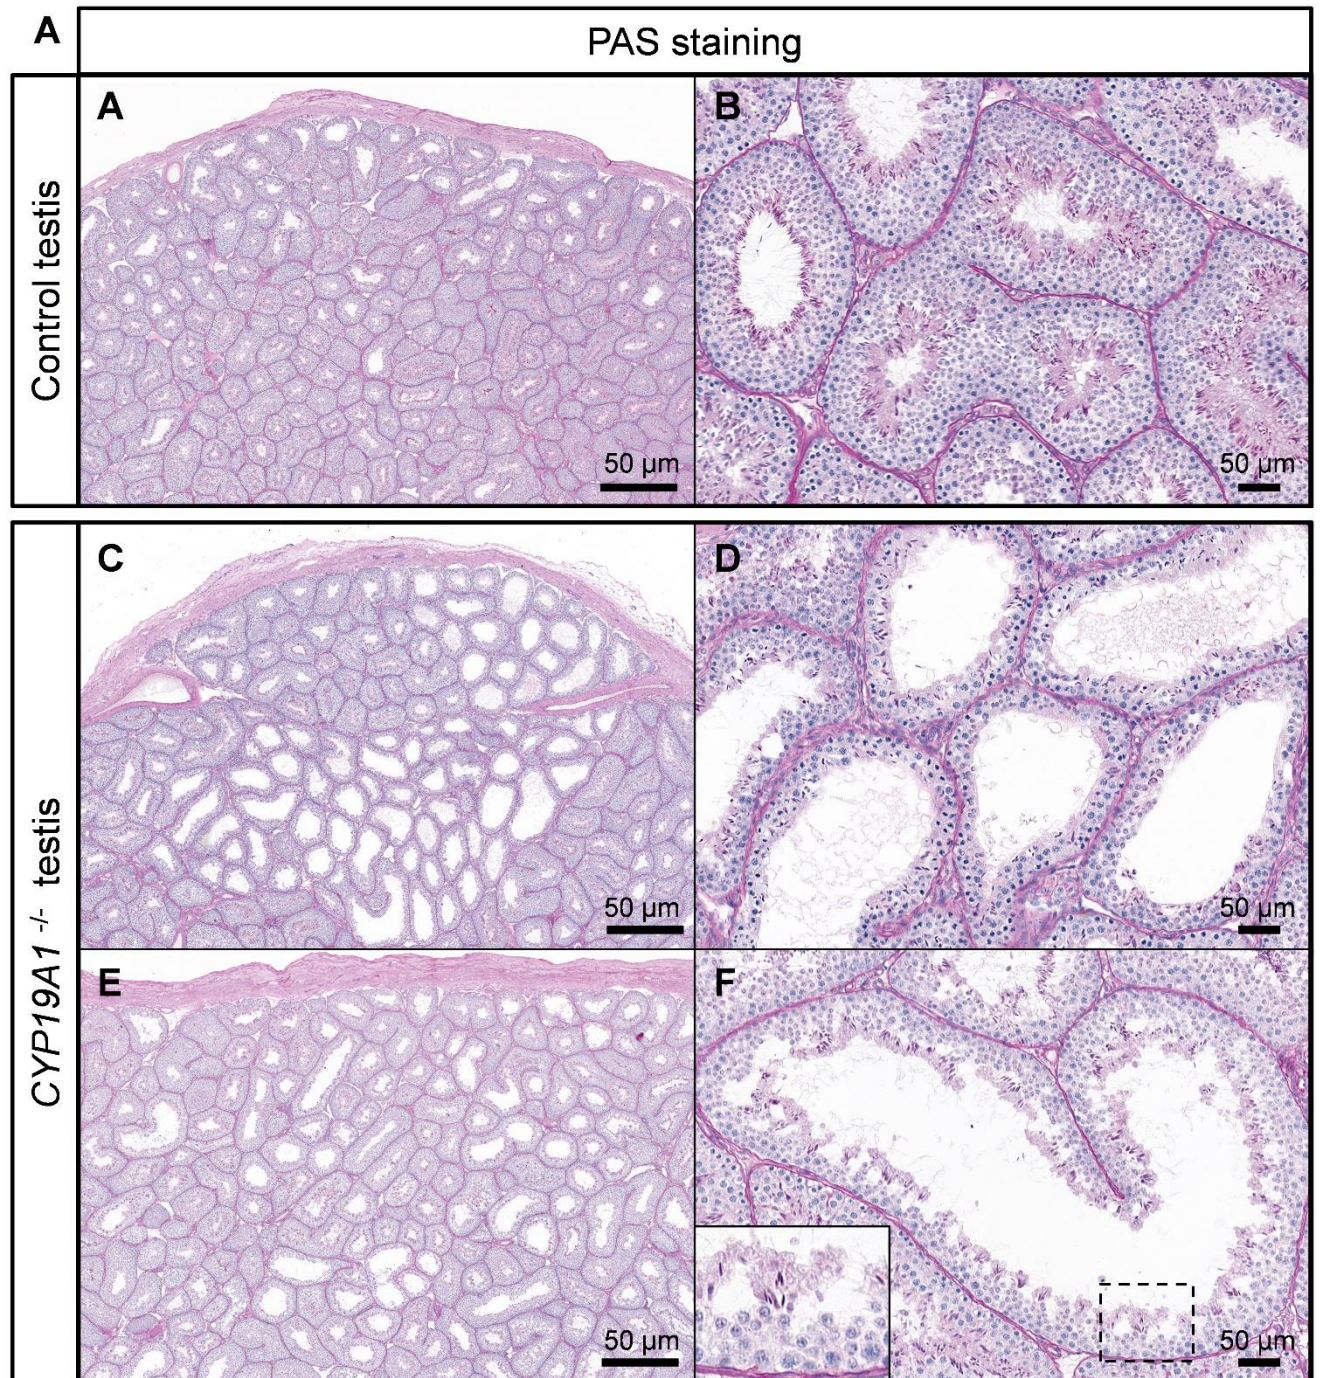

**Figure 4.** Spermatogenesis defects in absence of estrogen production. (A-B) PAS staining on control testis. (C-F) PAS staining on *CYP19A1*<sup>-/-</sup> testis from two different rabbits (C-D and E-F). Males are 2 to 3 years old.

275  
276  
277  
278  
279  
280  
281  
282

283  
284  
285

286  
287  
288  
289  
290  
291  
292  
293

Molecular analyses confirmed a defect in the transition from spermatocytes to spermatids, with decreased mRNA levels of *SYCP3* (pValue = 0.057) and *PRM1* (Protamine 1) (pValue = 0.02) (Figure 5A and B). Consistent with spermatogenesis abnormalities, testis to body weight ratio was found to be significantly lower in *CYP19A1*<sup>-/-</sup> males compared to control ones (Figure 5C). In addition, total sperm number was estimated using the IVOS II CASA system (computer assisted sperm analysis), showing that the sperm count was significantly decreased in absence of estrogen synthesis (Figure 5D).

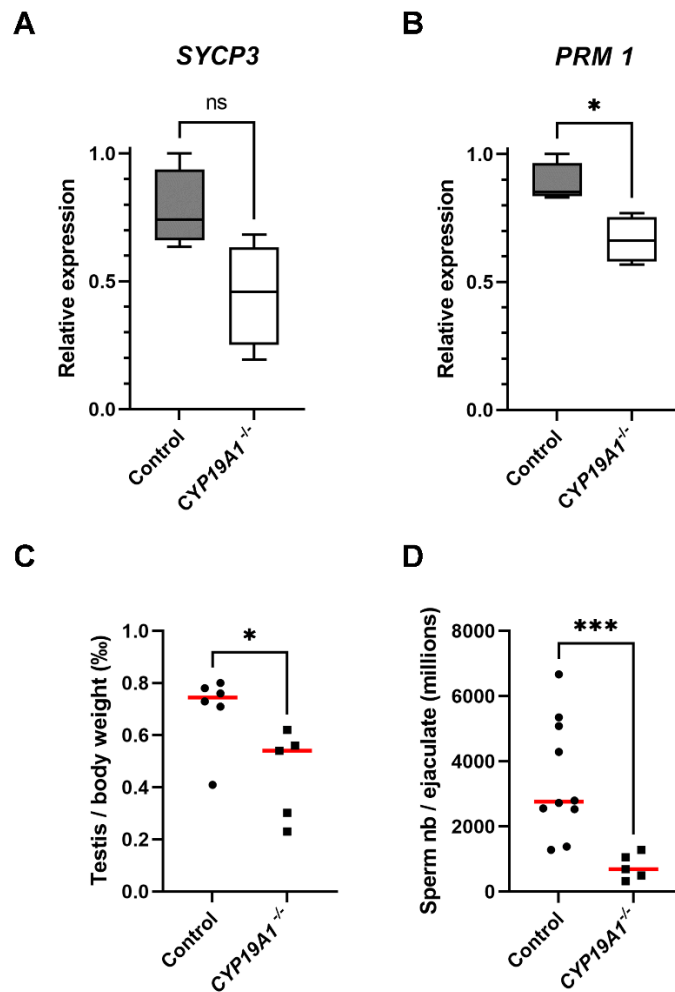

294  
295  
296  
297  
298  
299  
300  
301  
302  
303  
304  
305  
306  
307  
308  
309  
310

**Figure 5.** Hypo-spermatogenesis in *CYP19A1*<sup>-/-</sup> males. (A-B) RT-qPCR analyses of mRNA levels of *SYCP3* and *PRM1* in control and *CYP19A1*<sup>-/-</sup> adult testis (n=5 for each genotype). (C) Testis on body weight ratio in control and *CYP19A1*<sup>-/-</sup> rabbits. Control, n=6; *CYP19A1*<sup>-/-</sup> n = 5. The median is shown in red. (D) Total sperm counts per million per ejaculated sample in control and *CYP19A1*<sup>-/-</sup> rabbits. Control, n=10; *CYP19A1*<sup>-/-</sup> n = 5. Dots represent the average of two successive semen collections per animal. For *CYP19A1*<sup>-/-</sup> rabbits, three sets of two successive ejaculations were collected over a one-year interval. The median is shown in red. Mann-Whitney test: \*pValue<0.05. ns: non significant.

### 3.5. Absence of testicular estrogens has no impact on germ cell DNA methylation

Since estrogen receptor over activation has been linked to epigenetic modifications [24], we were interested in the DNA methylation of germ cells. Nevertheless, immunofluorescence studies of the deposition of 5-methyl Cytosine (DNA methylation) or the 5-hydroxymethyl Cytosine (DNA hydroxymethylation, i.e. DNA demethylation) showed no difference between control and *CYP19A1*<sup>-/-</sup> testes (Figure 6A). In addition, the DNA methylation rate of ejaculated sperm was determined by luminometric methylation assay (LUMA). The percentage of DNA methylation, around 70%, was found identical



311  
312  
313  
314

between sperm from control and mutant rabbits (Figure 6B), suggesting that if estrogen plays a role in epigenetics of the male gamete, this might not have been detected by global DNA methylation assessment.

**A**

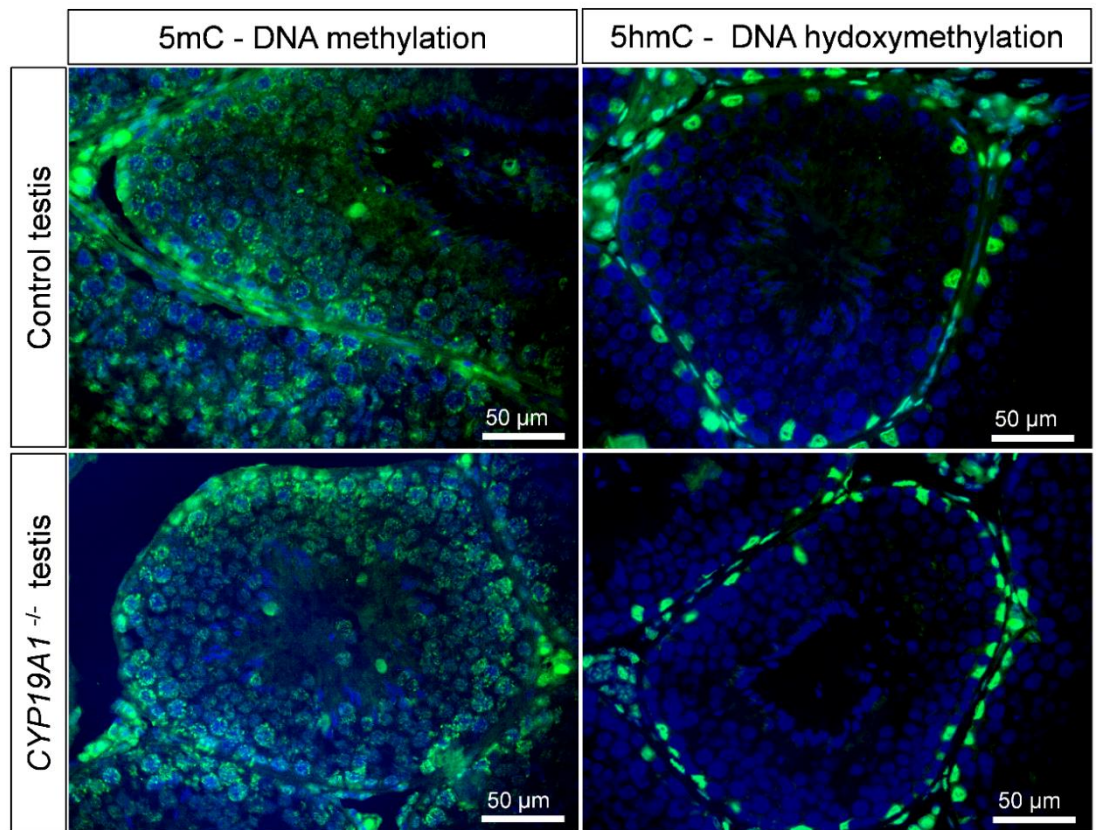

**B**

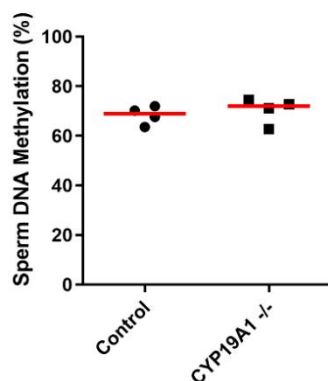

315  
316  
317  
318  
319  
320  
321  
322  
323  
324

**Figure 6.** DNA methylation in the testis and sperm in absence of estrogen synthesis. **(A)** Immunodetection of 5mC and 5hmC in control and *CYP19A1*<sup>-/-</sup> testis (green). Nuclei were stained in blue (DAPI). **(B)** Percentage of sperm DNA methylation from control and *CYP19A1*<sup>-/-</sup> male rabbits determined by Luminometric Methylation Assay (LUMA). The median is shown in red. Mann-Whitney test: nonsignificant.

### 3.6. Absence of testicular estrogen leads to sperm defects

In order to better understand the subfertility of *CYP19A1*<sup>-/-</sup> males, the sperm parameters of mutant and control rabbits were evaluated using the IVOS II CASA system on ejaculated sperm. Of the parameters assessed by this procedure, six were found

325  
326  
327  
328  
329  
330  
331

statistically divergent between control and mutant sperm (Figure 7A-F). First, we noticed a decrease in total (from 90% to 55 %) and progressive (from 60% to 30%) sperm motility in mutant rabbits (Figure 7A and 7B). Second, the mutants displayed increased sperm malformations such as bent tails and Distal Midpiece Reflex curvatures (DMR) (Figure 7C and 7D). Finally, the spermatozoa from mutant animals retained more proximal and distal (Figure 7E and 7F) cytoplasmic droplets than the control sperm, suggesting an imperfect maturation of the gametes during their transit in the epididymis [42].

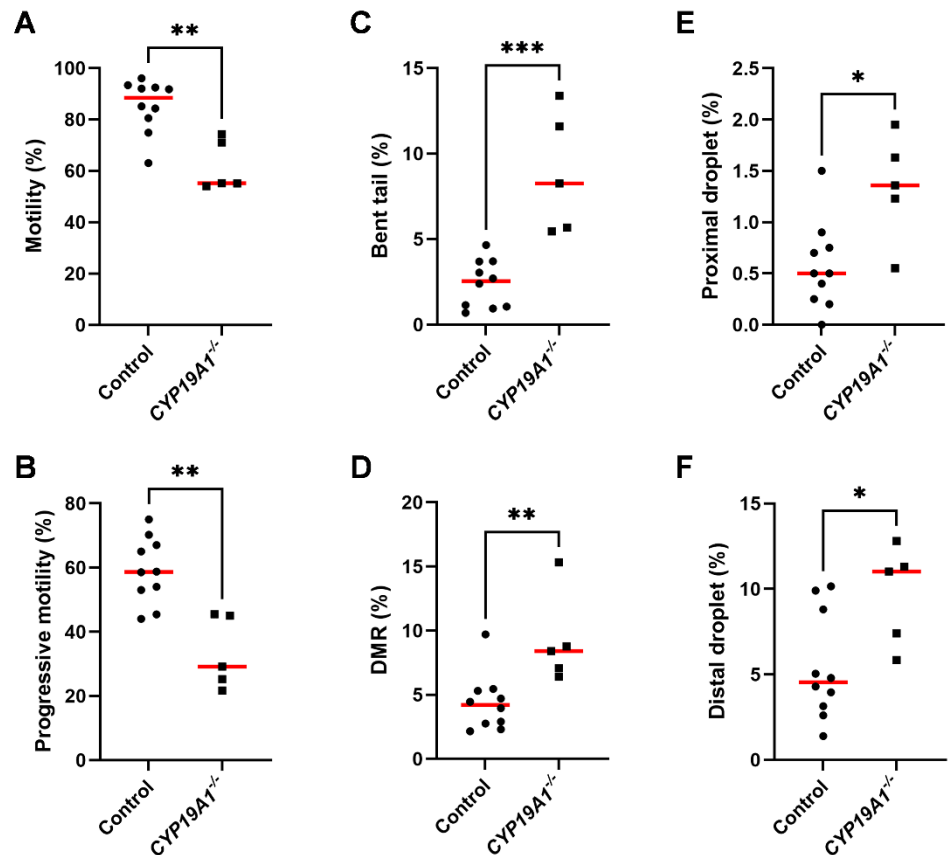

332  
333  
334  
335  
336  
337  
338  
339  
340  
341

**Figure 7.** Spermatic parameters in control and *CYP19A1*<sup>-/-</sup> rabbits. Motility and morphometric parameters of the sperm from control and *CYP19A1*<sup>-/-</sup> rabbits were obtained by Computer Assisted Sperm Analysis. Percentages of (A) total motility and (B) progressive motility of the sperm were decreased in mutants. Percentages of (C) bent tails and (D) Distal Midpiece Reflex were increased in *CYP19A1*<sup>-/-</sup> semen, together with (E) proximal droplets and (F) distal droplets. Dots represent the average of two successive semen collections per animal. For *CYP19A1*<sup>-/-</sup> rabbits, three sets of two successive ejaculations were collected over a one-year interval. The median is shown in red. Control n=10; *CYP19A1*<sup>-/-</sup> n=5. Mann-Whitney test: \* pValue<0.05; \*\* pValue<0.005; \*\*\* pValue<0.0005.

342  
343  
344  
345  
346  
347  
348  
349  
350

#### 4. Discussion

In rabbits, the production of estrogen by the adult testes is strictly limited to the germ cells inside the seminiferous tubules: mainly to the meiotic germ cells (pachytene spermatocytes), but also slightly to the post-meiotic ones (round spermatids). While the location of *aromatase* expression differs according to the published studies, several of them are concordant on this point in rodents and in humans [9,14,15]. Thus, because of the blood-testis barrier established in the tubules, testicular estrogens should not pass through the general circulation in rabbits, but rather have a local function on the germ cells themselves, or on the male genital tract. Accordingly, 17 $\beta$ -Estradiol could be



351 measured in the head and the tail of epididymis, showing that testicular estrogens diffuse  
352 into the fluid during the epididymal transit.

#### 353 4.1. Testicular estrogens are involved in germ cells differentiation

354 In the testis, both *ESR1* and *ESR2* receptors were detected in round spermatids,  
355 suggesting that estrogens may have a role on post-meiotic germ cells. Accordingly, hypo-  
356 spermatogenesis has been observed in homozygous *CYP19A1*<sup>-/-</sup> mutant males, with some  
357 testicular lobules showing thinner seminiferous epithelium, with a lack of round  
358 spermatids, as described in the ArKO mouse model [31,32]. In the rat, overstimulation of  
359 *ESR1* or *ESR2* leads to spermiogenesis defects [22]. Thus, a lack or an excess of estrogens  
360 may impact spermatid differentiation. Additionally, epigenetic defects in the spermatids  
361 have been reported when estrogen receptors were overstimulated [23,24]. But, in this  
362 present study, we could not detect any changes in DNA methylation in the absence of  
363 estrogen. This may be related to the use of inappropriate methods, but estrogen might  
364 also not be involved in epigenetic reprogramming in normal situations.

365 In humans, loss-of-function mutations affecting *CYP19A1/Aromatase* gene are very  
366 rare and poorly documented. In one reported case, the authors described abnormal  
367 skeletal growth and bone maturation in a male patient, which were associated with  
368 testicular hypoplasia and infertility [35]. The initiation of a replacement therapy by daily  
369 injection of estrogens restored the bone/skeletal phenotype, but had no effect on the  
370 testicles or fertility disorders. This last aspect could be linked to the fact that estrogens  
371 must be produced locally in the seminiferous tubules in order to be able to act on the  
372 differentiation of germ cells. In addition, a testicular biopsy, performed in this patient,  
373 revealed hypo-spermatogenesis and an arrest of germ differentiation, mainly at the level  
374 of primary spermatocytes [35]. This phenotype is close to that observed in rabbits, where  
375 round spermatids were rare in some tubules of the *CYP19A1*<sup>-/-</sup> males, suggesting either  
376 that estrogens are necessary for their differentiation or maintenance, or that estrogens may  
377 be involved in the completion of meiosis. Interestingly, overexposure to estrogen or BPA  
378 has the same impact on spermatogenesis, with meiotic progression being defective and  
379 stopping at the pachytene stage [43]. In addition, in the female, the resumption of oocyte  
380 meiosis (with the first polar body extrusion) has been shown to be improved *in vitro* by  
381 the addition of estrogens to the medium [44]. In the present study, in rabbits deficient for  
382 aromatase, *SYCP3* and *PRM1* mRNAs levels were found to be decreased (pValue = 0.057  
383 and 0.02 respectively) which could be an additional clue to consider the function of  
384 estrogens on meiotic cells. Further investigations involving high throughput  
385 transcriptome sequencing may highlight the potential implication of estrogens into  
386 meiosis in males.

#### 387 4.2. Testicular estrogens are involved in sperm production, maturation and motility

388 As a consequence of the described defect in spermatogenesis, mild but significant  
389 testicular hypoplasia was observed in *CYP19A1*<sup>-/-</sup> rabbits and the number of ejaculated  
390 spermatozoa decreased. These animals presented slight subfertility with conception  
391 difficulties (unsuccessful mating), as well as a decrease in the number of offspring. In  
392 addition of a decrease in sperm count, an increase in sperm abnormalities was observed.  
393 First, like in humans [34,35] and mice [29,31,32], sperm motility was affected, with a 50%  
394 reduction of the progressive motility in *CYP19A1*<sup>-/-</sup> compared to control males. Then,  
395 related to the motility defects, increased percentages of flagellar abnormalities were noted,  
396 including bent tail and Distal Midpiece Reflex (DMR) which were doubled in mutants. In  
397 addition, proportion of sperm with cytoplasmic residual droplets was increased. These  
398 last phenotypes could be related to sperm maturation trouble in the epididymis, where  
399 sperm motility is acquired. In particular, the cytoplasmic droplet is expected to migrate  
400 caudally along the sperm during epididymal transit, and this droplet has been implicated  
401 in affecting some biochemical aspects of motility [45]. Some signaling pathways have been  
402  
403

404 associated with sperm motility, and evidence suggests that sperm may have functional  
405 flagellar machinery that is activated during epididymal transit [45]. Indeed, in the  
406 epididymis, sperm undergo protein changes. As sperm are translationally silent, proteins  
407 appearing in them are thought to be synthesized by the epididymal epithelium and then  
408 incorporated to the sperm cells, thanks to exosomes for instance, called epididymosomes  
409 [46]. ESR1 and ESR2 receptors were both detected in the epididymis of male rabbits,  
410 mainly in the tail, where estrogens seem thus to exert their functions. In particular, ESR2  
411 was found in the epithelial cells, which are supposed to secrete epididymosomes.  
412 Additional analyses on the transcriptomes and proteomes of mutant epididymides could  
413 provide clues to better understand how estrogen pathway dysfunctions impact sperm  
414 maturation and motility.

## 415 5. Conclusion

416 In the rabbit, testicular estrogens are produced by meiotic germ cells inside the  
417 seminiferous tubules. They play two main roles in promoting the fertility of the male  
418 gamete: (i) on germ cells and their progression in spermatogenesis; (ii) on the epididymis  
419 and indirectly on sperm maturation and motility acquisition. The phenotype of the  
420 *CYP19A1*<sup>-/-</sup> rabbits is very similar to the rare cases of *aromatase* mutations reported in  
421 humans, making the rabbit a relevant biomedical model for understanding and  
422 preventing male fertility.

423  
424 **Author Contributions:** Conceptualization, G.J. and M.P.; Methodology, A.D., E.D., M.A., A.A., F.G.,  
425 H.J., E.S., G.J and M.P.; Validation, A.D., E.D., A.A, M.A., and H.J.; Formal Analysis, A.D., E.D., E.P.  
426 and M.P. Investigation, A.D., G.J and M.P.; Writing – Original Draft Preparation, M.P., E.P. and A.D;  
427 Writing – Review & Editing, H.J, G.J, E.P. and M.P.; Supervision, M.P.; Funding Acquisition, G.J.  
428 and E.P..

429 **Funding:** This research was funded by ANR grants (GENIDOV: ANR-09-GENM-009; ARGONADS:  
430 ANR-13-BSV2-0017; ARDIGERM: ANR-2020-CE14), and CELPHEDIA infrastructure  
431 (CELPHEEDIA France, 2017).

432 **Institutional Review Board Statement:** The study was conducted according to the guidelines of  
433 Declaration of Helsinki, and approved by the French Ministry MENESR (accreditation number  
434 APAFIS#6775-2016091911407980 vI) following the recommendation given by the local committee  
435 for ethic in animal experimentation (COMETHEA, Jouy-en-Josas, France). All researchers working  
436 directly with the animals possessed an animal experimentation license delivered by the French  
437 veterinary services.

438 **Data Availability Statement:** Not applicable.

439 **Acknowledgments:** The authors would like to thank Patrice Congar, Gwendoline Morin and all the  
440 staff of the facility (SAAJ, INRAE, Jouy-en-Josas) for the care of the rabbits and semen collection,  
441 and Julie Rivière and Marthe Vilotte (UMR GABI, INRAE, Jouy-en-Josas) for their assistance on the  
442 histological platform (@Bridge platform) and for the access to the virtual slide scanner.

443 **Conflicts of Interest:** The authors declare no conflict of interest. The funders had no role in the  
444 design of the study; in the collection, analyses, or interpretation of data; in the writing of the  
445 manuscript; or in the decision to publish the results.

## 446 References

- 447 1. Guiguen, Y.; Baroiller, J.F.; Ricordel, M.J.; Iseki, K.; Mcmeel, O.M.; Martin, S.A.; Fostier, A. Involvement of Estrogens in the  
448 Process of Sex Differentiation in Two Fish Species: The Rainbow Trout (*Oncorhynchus Mykiss*) and a Tilapia (*Oreochromis*  
449 *Niloticus*). *Mol Reprod Dev* **1999**, *54*, 154–162, doi:10.1002/(SICI)1098-2795(199910)54:2<154::AID-MRD7>3.0.CO;2-5.
- 450 2. Pieau, C.; Dorizzi, M.; Richard-Mercier, N. Temperature-Dependent Sex Determination and Gonadal Differentiation in  
451 Reptiles. *Cell Mol Life Sci* **1999**, *55*, 887–900, doi:10.1007/s000180050342.

- 452 3. Elbrecht, A.; Smith, R.G. Aromatase Enzyme Activity and Sex Determination in Chickens. *Science* **1992**, *255*, 467–470,  
453 doi:10.1126/science.1734525.
- 454 4. Wade, J.; Arnold, A.P. Functional Testicular Tissue Does Not Masculinize Development of the Zebra Finch Song System. *Proc*  
455 *Natl Acad Sci U S A* **1996**, *93*, 5264–5268, doi:10.1073/pnas.93.11.5264.
- 456 5. Vaillant, S.; Dorizzi, M.; Pieau, C.; Richard-Mercier, N. Sex Reversal and Aromatase in Chicken. *J Exp Zool* **2001**, *290*, 727–740,  
457 doi:10.1002/jez.1123.
- 458 6. Jost, A. A New Look at the Mechanisms Controlling Sex Differentiation in Mammals. *Johns Hopkins Med J* **1972**, *130*, 38–53.
- 459 7. Hess, R.A.; Sharpe, R.M.; Hinton, B.T. Estrogens and Development of the Rete Testis, Efferent Ductules, Epididymis and Vas  
460 Deferens. *Differentiation* **2021**, *118*, 41–71, doi:10.1016/j.diff.2020.11.004.
- 461 8. Lambard, S.; Silandre, D.; Delalande, C.; Denis-Galeraud, I.; Bourguiba, S.; Carreau, S. Aromatase in Testis: Expression and  
462 Role in Male Reproduction. *J Steroid Biochem Mol Biol* **2005**, *95*, 63–69, doi:10.1016/j.jsbmb.2005.04.020.
- 463 9. Levallet, J.; Bilinska, B.; Mittre, H.; Genissel, C.; Fresnel, J.; Carreau, S. Expression and Immunolocalization of Functional  
464 Cytochrome P450 Aromatase in Mature Rat Testicular Cells1. *Biology of Reproduction* **1998**, *58*, 919–926,  
465 doi:10.1095/biolreprod58.4.919.
- 466 10. Fraczek, B.; Kotula-Balak, M.; Wojtusiak, A.; Pierściński, A.; Bilińska, B. Cytochrome P450 Aromatase in the Testis of Immature  
467 and Mature Pigs. *Reprod Biol* **2001**, *1*, 51–59.
- 468 11. Sipahutar, H.; Sourdaïne, P.; Moslemi, S.; Plainfossé, B.; Séralini, G.-E. Immunolocalization of Aromatase in Stallion Leydig  
469 Cells and Seminiferous Tubules. *J Histochem Cytochem* **2003**, *51*, 311–318, doi:10.1177/002215540305100306.
- 470 12. Payne, A.H.; Kelch, R.P.; Musich, S.S.; Halpern, M.E. Intratesticular Site of Aromatization in the Human. *J Clin Endocrinol Metab*  
471 **1976**, *42*, 1081–1087, doi:10.1210/jcem-42-6-1081.
- 472 13. Papadopoulos, V.; Carreau, S.; Szerman-Joly, E.; Drosdowsky, M.A.; Dehennin, L.; Scholler, R. Rat Testis 17 $\beta$ -Estradiol:  
473 Identification by Gas Chromatography-Mass Spectrometry and Age Related Cellular Distribution. *Journal of Steroid*  
474 *Biochemistry* **1986**, *24*, 1211–1216, doi:10.1016/0022-4731(86)90385-7.
- 475 14. Nitta, H.; Bunick, D.; Hess, R.A.; Janulis, L.; Newton, S.C.; Millette, C.F.; Osawa, Y.; Shizuta, Y.; Toda, K.; Bahr, J.M. Germ Cells  
476 of the Mouse Testis Express P450 Aromatase. *Endocrinology* **1993**, *132*, 1396–1401, doi:10.1210/endo.132.3.8440194.
- 477 15. Lambard, S.; Galeraud-Denis, I.; Saunders, P.T.K.; Carreau, S. Human Immature Germ Cells and Ejaculated Spermatozoa  
478 Contain Aromatase and Oestrogen Receptors. *J Mol Endocrinol* **2004**, *32*, 279–289, doi:10.1677/jme.0.0320279.
- 479 16. Rago, V.; Aquila, S.; Panza, R.; Carpino, A. Cytochrome P450arom, Androgen and Estrogen Receptors in Pig Sperm. *Reprod*  
480 *Biol Endocrinol* **2007**, *5*, 23, doi:10.1186/1477-7827-5-23.
- 481 17. Dostalova, P.; Zatecka, E.; Dvorakova-Hortova, K. Of Oestrogens and Sperm: A Review of the Roles of Oestrogens and  
482 Oestrogen Receptors in Male Reproduction. *Int J Mol Sci* **2017**, *18*, E904, doi:10.3390/ijms18050904.
- 483 18. Pelletier, G.; El-Alfy, M. Immunocytochemical Localization of Estrogen Receptors Alpha and Beta in the Human Reproductive  
484 Organs. *J Clin Endocrinol Metab* **2000**, *85*, 4835–4840, doi:10.1210/jcem.85.12.7029.
- 485 19. Fietz, D.; Ratzenböck, C.; Hartmann, K.; Raabe, O.; Kliesch, S.; Weidner, W.; Klug, J.; Bergmann, M. Expression Pattern of  
486 Estrogen Receptors  $\alpha$  and  $\beta$  and G-Protein-Coupled Estrogen Receptor 1 in the Human Testis. *Histochem Cell Biol* **2014**, *142*,  
487 421–432, doi:10.1007/s00418-014-1216-z.
- 488 20. Cavaco, J.E.B.; Laurentino, S.S.; Barros, A.; Sousa, M.; Socorro, S. Estrogen Receptors Alpha and Beta in Human Testis: Both  
489 Isoforms Are Expressed. *Syst Biol Reprod Med* **2009**, *55*, 137–144, doi:10.3109/19396360902855733.
- 490 21. Hirata, S.; Shoda, T.; Kato, J.; Hoshi, K. Isoform/Variant MRNAs for Sex Steroid Hormone Receptors in Humans. *Trends*  
491 *Endocrinol Metab* **2003**, *14*, 124–129, doi:10.1016/s1043-2760(03)00028-6.
- 492 22. Dumasia, K.; Kumar, A.; Deshpande, S.; Sonawane, S.; Balasinor, N.H. Differential Roles of Estrogen Receptors, ESR1 and  
493 ESR2, in Adult Rat Spermatogenesis. *Mol Cell Endocrinol* **2016**, *428*, 89–100, doi:10.1016/j.mce.2016.03.024.

- 494 23. Dumasia, K.; Kumar, A.; Deshpande, S.; Balasino, N.H. Estrogen, through Estrogen Receptor 1, Regulates Histone  
495 Modifications and Chromatin Remodeling during Spermatogenesis in Adult Rats. *Epigenetics* **2017**, *12*, 953–963,  
496 doi:10.1080/15592294.2017.1382786.
- 497 24. Dumasia, K.; Kumar, A.; Deshpande, S.; Balasino, N.H. Estrogen Signaling, through Estrogen Receptor  $\beta$ , Regulates DNA  
498 Methylation and Its Machinery in Male Germ Line in Adult Rats. *Epigenetics* **2017**, *12*, 476–483,  
499 doi:10.1080/15592294.2017.1309489.
- 500 25. Kregge, J.H.; Hodgin, J.B.; Couse, J.F.; Enmark, E.; Warner, M.; Mahler, J.F.; Sar, M.; Korach, K.S.; Gustafsson, J.A.; Smithies, O.  
501 Generation and Reproductive Phenotypes of Mice Lacking Estrogen Receptor Beta. *Proc Natl Acad Sci U S A* **1998**, *95*, 15677–  
502 15682, doi:10.1073/pnas.95.26.15677.
- 503 26. Antal, M.C.; Krust, A.; Chambon, P.; Mark, M. Sterility and Absence of Histopathological Defects in Nonreproductive Organs  
504 of a Mouse ERbeta-Null Mutant. *Proc Natl Acad Sci U S A* **2008**, *105*, 2433–2438, doi:10.1073/pnas.0712029105.
- 505 27. Otto, C.; Fuchs, I.; Kauselmann, G.; Kern, H.; Zevnik, B.; Andreasen, P.; Schwarz, G.; Altmann, H.; Klewer, M.; Schoor, M.; et  
506 al. GPR30 Does Not Mediate Estrogenic Responses in Reproductive Organs in Mice. *Biol Reprod* **2009**, *80*, 34–41,  
507 doi:10.1095/biolreprod.108.071175.
- 508 28. Eddy, E.M.; Washburn, T.F.; Bunch, D.O.; Goulding, E.H.; Gladen, B.C.; Lubahn, D.B.; Korach, K.S. Targeted Disruption of the  
509 Estrogen Receptor Gene in Male Mice Causes Alteration of Spermatogenesis and Infertility. *Endocrinology* **1996**, *137*, 4796–4805,  
510 doi:10.1210/endo.137.11.8895349.
- 511 29. Joseph, A.; Hess, R.A.; Schaeffer, D.J.; Ko, C.; Hudgin-Spivey, S.; Chambon, P.; Shur, B.D. Absence of Estrogen Receptor Alpha  
512 Leads to Physiological Alterations in the Mouse Epididymis and Consequent Defects in Sperm Function. *Biol Reprod* **2010**, *82*,  
513 948–957, doi:10.1095/biolreprod.109.079889.
- 514 30. Joseph, A.; Shur, B.D.; Ko, C.; Chambon, P.; Hess, R.A. Epididymal Hypo-Osmolality Induces Abnormal Sperm Morphology  
515 and Function in the Estrogen Receptor Alpha Knockout Mouse. *Biol Reprod* **2010**, *82*, 958–967,  
516 doi:10.1095/biolreprod.109.080366.
- 517 31. Robertson, K.M.; O'Donnell, L.; Jones, M.E.E.; Meachem, S.J.; Boon, W.C.; Fisher, C.R.; Graves, K.H.; McLachlan, R.I.; Simpson,  
518 E.R. Impairment of Spermatogenesis in Mice Lacking a Functional Aromatase (Cyp 19) Gene. *Proceedings of the National*  
519 *Academy of Sciences* **1999**, *96*, 7986–7991, doi:10.1073/pnas.96.14.7986.
- 520 32. Robertson, K.M.; Simpson, E.R.; Lacham-Kaplan, O.; Jones, M.E. e. Characterization of the Fertility of Male Aromatase  
521 Knockout Mice. *Journal of Andrology* **2001**, *22*, 825–830, doi:10.1002/j.1939-4640.2001.tb02587.x.
- 522 33. Haverfield, J.T.; Ham, S.; Brown, K.A.; Simpson, E.R.; Meachem, S.J. Teasing out the Role of Aromatase in the Healthy and  
523 Diseased Testis. *Spermatogenesis* **2011**, *1*, 240, doi:10.4161/spmg.1.3.18037.
- 524 34. Herrmann, B.L.; Saller, B.; Janssen, O.E.; Gocke, P.; Bockisch, A.; Sperling, H.; Mann, K.; Broecker, M. Impact of Estrogen  
525 Replacement Therapy in a Male with Congenital Aromatase Deficiency Caused by a Novel Mutation in the CYP19 Gene. *J Clin*  
526 *Endocrinol Metab* **2002**, *87*, 5476–5484, doi:10.1210/jc.2002-020498.
- 527 35. Carani, C.; Qin, K.; Simoni, M.; Faustini-Fustini, M.; Serpente, S.; Boyd, J.; Korach, K.S.; Simpson, E.R. Effect of Testosterone  
528 and Estradiol in a Man with Aromatase Deficiency. *N Engl J Med* **1997**, *337*, 91–95, doi:10.1056/NEJM199707103370204.
- 529 36. Jolivet, G.; Daniel-Carlier, N.; Harscoët, E.; Airaud, E.; Dewaele, A.; Pierson, C.; Giton, F.; Boulanger, L.; Daniel, N.; Mandon-  
530 Pépin, B.; et al. Fetal Estrogens Are Not Involved in Sex Determination But Critical for Early Ovarian Differentiation in Rabbits.  
531 *Endocrinology* **2022**, *163*, bqab210, doi:10.1210/endo/bqab210.
- 532 37. Hellemans, J.; Mortier, G.; De Paepe, A.; Speleman, F.; Vandesompele, J. QBase Relative Quantification Framework and  
533 Software for Management and Automated Analysis of Real-Time Quantitative PCR Data. *Genome Biology* **2007**, *8*, R19,  
534 doi:10.1186/gb-2007-8-2-r19.



- 535 38. Giton, F.; Sirab, N.; Franck, G.; Gervais, M.; Schmidlin, F.; Ali, T.; Allory, Y.; de la Taille, A.; Vacherot, F.; Loric, S.; et al. Evidence  
536 of Estrone-Sulfate Uptake Modification in Young and Middle-Aged Rat Prostate. *J Steroid Biochem Mol Biol* **2015**, *152*, 89–100,  
537 doi:10.1016/j.jsbmb.2015.05.002.
- 538 39. Devillers, M.M.; Petit, F.; Cluzet, V.; François, C.M.; Giton, F.; Garrel, G.; Cohen-Tannoudji, J.; Guigon, C.J. FSH Inhibits AMH  
539 to Support Ovarian Estradiol Synthesis in Infantile Mice. *J Endocrinol* **2019**, *240*, 215–228, doi:10.1530/JOE-18-0313.
- 540 40. Perrier, J.-P.; Sellem, E.; Prézelin, A.; Gasselin, M.; Jouneau, L.; Piumi, F.; Al Adhami, H.; Weber, M.; Fritz, S.; Boichard, D.; et  
541 al. A Multi-Scale Analysis of Bull Sperm Methylome Revealed Both Species Peculiarities and Conserved Tissue-Specific  
542 Features. *BMC Genomics* **2018**, *19*, 404, doi:10.1186/s12864-018-4764-0.
- 543 41. Karimi, M.; Johansson, S.; Stach, D.; Corcoran, M.; Grandér, D.; Schalling, M.; Bakalkin, G.; Lyko, F.; Larsson, C.; Ekström, T.J.  
544 LUMA (LUMinometric Methylation Assay)—a High Throughput Method to the Analysis of Genomic DNA Methylation. *Exp*  
545 *Cell Res* **2006**, *312*, 1989–1995, doi:10.1016/j.yexcr.2006.03.006.
- 546 42. Cooper, T.G. Cytoplasmic Droplets: The Good, the Bad or Just Confusing? *Human Reproduction* **2005**, *20*, 9–11,  
547 doi:10.1093/humrep/deh555.
- 548 43. Liu, C.; Duan, W.; Li, R.; Xu, S.; Zhang, L.; Chen, C.; He, M.; Lu, Y.; Wu, H.; Pi, H.; et al. Exposure to Bisphenol A Disrupts  
549 Meiotic Progression during Spermatogenesis in Adult Rats through Estrogen-like Activity. *Cell Death Dis* **2013**, *4*, e676,  
550 doi:10.1038/cddis.2013.203.
- 551 44. Chi, H.; Cao, Z. Effect of Oestrogen on Mouse Follicle Growth and Meiotic Resumption. *Zygote* **2022**, *30*, 330–337,  
552 doi:10.1017/S0967199421000708.
- 553 45. Gervasi, M.G.; Visconti, P.E. Molecular Changes and Signaling Events Occurring in Sperm during Epididymal Maturation.  
554 **2018**, *30*.
- 555 46. Sullivan, R.; Saez, F. Epididymosomes, Prostatosomes, and Liposomes: Their Roles in Mammalian Male Reproductive  
556 Physiology. *Reproduction* **2013**, *146*, R21-35, doi:10.1530/REP-13-0058.
- 557  
558
